# Supplementary material
Source: PubMed Central journal article supplement (PMC5971615)
Supplement: AAC.00028-18_zac006187213s1.pdf [file AAC.00028-18_zac006187213s1.pdf]

**Table S1.** Log change in viable cell counts with polymyxin B (PMB) and enrofloxacin (ENRO) mono- and combination therapy against all three isolates of *Pseudomonas aeruginosa* in the static time-kill studies. The grey, green and orange backgrounds indicate activity (a  $\geq 1$  log<sub>10</sub> reduction compared to the initial inoculum), 1 to 2 log<sub>10</sub> more killing compared to the most active monotherapy, and synergy (>2 log<sub>10</sub> more killing compared to the most active monotherapy), respectively.

| Time (h)       | Log change [ $\text{Log}_{10}(\text{CFU}_t) - \text{Log}_{10}(\text{CFU}_0)$ ] |       |       |       |       |      |                                 |       |      |      |      |      |                             |       |       |       |      |      |
|----------------|--------------------------------------------------------------------------------|-------|-------|-------|-------|------|---------------------------------|-------|------|------|------|------|-----------------------------|-------|-------|-------|------|------|
|                | <i>P. aeruginosa</i> 12196                                                     |       |       |       |       |      | <i>P. aeruginosa</i> H131300444 |       |      |      |      |      | <i>P. aeruginosa</i> LESB58 |       |       |       |      |      |
|                | 0.5                                                                            | 1     | 2     | 4     | 6     | 24   | 0.5                             | 1     | 2    | 4    | 6    | 24   | 0.5                         | 1     | 2     | 4     | 6    | 24   |
| Growth control | 0.11                                                                           | 0.61  | 1     | 1.49  | 1.87  | 2.52 | 0.08                            | 0.24  | 0.59 | 0.97 | 1.75 | 2.59 | 0.1                         | 0.44  | 0.69  | 1.24  | 1.68 | 2.42 |
| PMB (4 mg/L)   | -1.7                                                                           | -1.74 | -1.46 | -1.36 | -1.2  | 1.74 | 0.07                            | 0.04  | 0.51 | 0.77 | 1.29 | 1.92 | -0.62                       | -0.74 | -0.58 | -0.28 | 0.13 | 1.7  |
| PMB (3 mg/L)   | -1.63                                                                          | -1.46 | -1.18 | -1.35 | -1.01 | 1.53 | 0.04                            | -0.03 | 0.44 | 0.73 | 1.29 | 1.95 | -0.43                       | -0.55 | -0.51 | -0.11 | 0.21 | 1.7  |
| PMB (2 mg/L)   | -1.52                                                                          | -1.3  | -1.15 | -0.66 | 0.26  | 1.84 | 0.16                            | 0.05  | 0.25 | 0.77 | 1.37 | 1.97 | -0.24                       | -0.42 | -0.31 | 0.01  | 0.65 | 1.83 |
| PMB (1 mg/L)   | -1.34                                                                          | -1.17 | -0.73 | 0.37  | 1.34  | 2.26 | 0.09                            | 0.24  | 0.72 | 1.1  | 1.51 | 2.08 | -0.26                       | -0.66 | 0.54  | 0.72  | 1.44 | 2.07 |

|                              |       |       |       |       |       |       |       |       |       |       |       |       |       |       |       |       |       |       |
|------------------------------|-------|-------|-------|-------|-------|-------|-------|-------|-------|-------|-------|-------|-------|-------|-------|-------|-------|-------|
| ENRO (4 mg/L)                | -1.7  | -1.9  | -2.54 | -2.94 | -2.02 | 1.33  | -0.52 | -0.42 | 0.48  | 0.31  | 0.79  | 1.13  | 0.11  | 0.34  | 0.74  | 1.19  | 1.72  | 2.5   |
| ENRO (3 mg/L)                | -0.7  | -0.73 | -1.63 | -1.72 | -2.02 | 2.03  | -0.49 | -0.47 | 0.48  | 0.56  | 1.11  | 1.38  | -0.1  | 0.37  | 0.74  | 1.2   | 1.83  | 2.44  |
| ENRO (2 mg/L)                | 0.01  | -0.11 | -0.66 | -0.46 | -0.23 | 2.03  | 0.16  | 0.27  | 0.51  | 0.62  | 1.29  | 2.16  | 0.06  | 0.25  | 0.61  | 1.17  | 1.86  | 2.26  |
| ENRO (1 mg/L)                | 0.09  | 0.12  | 0.27  | 0.97  | 1.06  | 1.94  | 0.16  | 0.38  | 0.47  | 1.01  | 1.51  | 2.52  | -0.1  | 0.32  | 0.63  | 1.22  | 2     | 2.58  |
| PMB (1 mg/L) + ENRO (1mg/L)  | -3.49 | -4.22 | -4.4  | -4.22 | -3.22 | -2.26 | 0.05  | -0.19 | -0.85 | -2.4  | -2.8  | 1.01  | -0.78 | -1.1  | -1.81 | -3.61 | -2.79 | -2.36 |
| PMB (1 mg/L) + ENRO (4 mg/L) | -2.17 | -3.11 | -4.34 | -5    | -6.6  | -3.5  | -0.02 | -0.85 | -2.25 | -3.41 | -3.85 | -2.76 | -0.03 | -0.28 | -0.96 | -2.12 | -2.22 | 1.19  |
| PMB (2 mg/L) + ENRO (2 mg/L) | -2.38 | -3.7  | -4.7  | -5    | -5.8  | -5.4  | 0.01  | -0.3  | -1.85 | -2.89 | -3.25 | -1.24 | -0.33 | -1.33 | -2.81 | -3.2  | -2.79 | -2.71 |
| PMB (2 mg/L) + ENRO (3 mg/L) | -2.73 | -4.19 | -4.82 | -4.82 | -5.6  | -4    | -0.03 | -0.79 | -2.14 | -3.55 | -4.39 | -2.28 | -0.27 | -1.06 | -2.12 | -1.84 | -2.68 | -1.89 |
| PMB (3 mg/L) + ENRO (2 mg/L) | -3.69 | -4.4  | -4.7  | -6.6  | -6.6  | -1.98 | 0.06  | -0.3  | -1.81 | -3.62 | -3.87 | -1.66 | -0.59 | -1.41 | -2.56 | -3.24 | -3    | -2.12 |
| PMB (3 mg/L) + ENRO (3 mg/L) | -3.94 | -4.79 | -5.18 | -5.68 | -6.18 | -5.06 | 0.04  | -0.84 | -2.3  | -4.87 | -4.17 | -1.99 | -1.01 | -2.14 | -3.15 | -4.17 | -3.3  | -2.12 |
| PMB (4 mg/L) + ENRO (4 mg/L) | -4.7  | -6.6  | -6.6  | -6.6  | -6.6  | -5.3  | 0.4   | -1.03 | -2.59 | -4.32 | -5.17 | -4.57 | -1.82 | -2.81 | -5.13 | -3.16 | -3.95 | -3.37 |

$\text{Log}_{10}(\text{CFU}_0)$  = Initial inoculum

**Table S2.** Log change in viable cell counts with polymyxin B (PMB) and enrofloxacin (ENRO) mono- and combination therapy against *P. aeruginosa* 12196 in IVM. The grey, green and orange backgrounds indicate activity ( $a \geq 1 \log_{10}$  reduction compared to the initial inoculum), 1 to 2  $\log_{10}$  more killing compared to the most active monotherapy, and synergy ( $>2 \log_{10}$  more killing compared to the most active monotherapy), respectively.

| Time (h) | Log change [ $\text{Log}_{10}(\text{CFU}_t) - \text{Log}_{10}(\text{CFU}_0)$ ] |                                  |                                    |                                                               |
|----------|--------------------------------------------------------------------------------|----------------------------------|------------------------------------|---------------------------------------------------------------|
|          | Growth control                                                                 | PMB<br>$C_{ss} = 4 \text{ mg/L}$ | ENRO<br>$C_{max} = 3 \text{ mg/L}$ | PMB $C_{ss} = 4$<br>mg/L + ENRO<br>$C_{max} = 3 \text{ mg/L}$ |
| 1        | -0.28                                                                          | -1.52                            | -0.08                              | -4.48                                                         |
| 2        | -0.17                                                                          | -1.56                            | -0.35                              | -4.01                                                         |
| 4        | 0.02                                                                           | -0.83                            | -0.69                              | -4.24                                                         |
| 6        | 0.28                                                                           | -0.28                            | -0.36                              | -3.97                                                         |
| 23       | -0.02                                                                          | -0.58                            | -0.77                              | -3.62                                                         |
| 25       | -0.03                                                                          | -0.65                            | -0.96                              | -4.79                                                         |
| 28       | -0.04                                                                          | -0.37                            | -1.08                              | -4.69                                                         |
| 48       | 0.19                                                                           | -0.36                            | -0.62                              | -2.83                                                         |

$\text{Log}_{10}(\text{CFU}_0)$  = Initial inoculum

**Table S3.** Log change in viable cell counts with polymyxin B (PMB) and enrofloxacin (ENRO) mono- and combination therapy against *P. aeruginosa* 12196 in the HFIM. The grey, green and orange backgrounds indicate activity (a  $\geq 1$  log<sub>10</sub> reduction compared to the initial inoculum), 1 to 2 log<sub>10</sub> more killing compared to the most active monotherapy, and synergy (>2 log<sub>10</sub> more killing compared to the most active monotherapy), respectively.

| Time (h) | Log change [ $\text{Log}_{10}(\text{CFU}_t) - \text{Log}_{10}(\text{CFU}_0)$ ] |                                  |                                    |                                                               |
|----------|--------------------------------------------------------------------------------|----------------------------------|------------------------------------|---------------------------------------------------------------|
|          | Growth control                                                                 | PMB<br>$C_{ss} = 4 \text{ mg/L}$ | ENRO<br>$C_{max} = 3 \text{ mg/L}$ | PMB $C_{ss} = 4$<br>mg/L + ENRO<br>$C_{max} = 3 \text{ mg/L}$ |
| 1        | 0.86                                                                           | -0.69                            | -1.50                              | -2.02                                                         |
| 2        | 1.66                                                                           | 0.32                             | -1.34                              | -3.47                                                         |
| 4        | 2.15                                                                           | 0.72                             | -2.07                              | -3.86                                                         |
| 6        | 2.58                                                                           | 0.54                             | -2.37                              | -5.85                                                         |
| 23       | 3.00                                                                           | 2.68                             | 1.41                               | -5.25                                                         |
| 25       | 3.00                                                                           | 2.56                             | 1.77                               | -4.78                                                         |
| 26       | 3.10                                                                           | 2.45                             | 1.79                               | -7.16                                                         |
| 28       | 3.14                                                                           | 2.62                             | 1.66                               | -7.16                                                         |
| 47       | 3.20                                                                           | 2.82                             | 2.54                               | -7.16                                                         |
| 49       | 3.30                                                                           | 2.90                             | 2.73                               | -7.16                                                         |

|     |      |      |      |       |
|-----|------|------|------|-------|
| 50  | 3.27 | 2.81 | 2.68 | -7.16 |
| 52  | 3.11 | 2.87 | 2.70 | -7.16 |
| 71  | 3.14 | 2.77 | 2.70 | -5.25 |
| 73  | 3.24 | 2.86 | 2.86 | -7.16 |
| 74  | 3.36 | 2.81 | 2.75 | -7.16 |
| 76  | 3.29 | 2.71 | 2.68 | -5.25 |
| 95  | 3.14 | 2.78 | 2.79 | -4.51 |
| 97  | 3.14 | 2.50 | 2.79 | -7.16 |
| 98  | 3.04 | 2.70 | 2.70 | -7.16 |
| 100 | 3.17 | 2.56 | 2.65 | -7.16 |
| 120 | 2.87 | 2.58 | 2.42 | -7.16 |

---

$\text{Log}_{10}(\text{CFU}_0)$  = Initial inoculum

**Table S4.** Population mean parameter estimates for the synergistic combination of polymyxin B (PMB) and enrofloxacin (ENRO) models against three *P. aeruginosa* isolates. Values in parentheses are standard errors.

| Parameter                                                             | Symbol                               | Unit   | Population mean (SE [%]) for strain, treatment |               |               |                      |                      |
|-----------------------------------------------------------------------|--------------------------------------|--------|------------------------------------------------|---------------|---------------|----------------------|----------------------|
|                                                                       |                                      |        | <i>P. aeruginosa</i> 12196                     |               |               | <i>P. aeruginosa</i> | <i>P. aeruginosa</i> |
|                                                                       |                                      |        | Static time-kill                               | IVM           | HFIM          | H131300444           | LESB58               |
| <b>Log<sub>10</sub> Initial inoculum</b>                              | Log <sub>10</sub> CFU <sub>0</sub>   | CFU/mL | 6.67 (2.23%)                                   | 7.46 (2.46%)  | 6.74 (1.72%)  | 6.47 (1.63%)         | 6.31 (1.99%)         |
| <b>Log<sub>10</sub> Maximum population size</b>                       | Log <sub>10</sub> CFU <sub>max</sub> | CFU/mL | 8.73 (5.67%)                                   | 8 (2.87%)     | 10.1 (1.54%)  | 8.59 (2.22%)         | 8.76 (2.71%)         |
| <b>Mutation frequency</b>                                             |                                      |        |                                                |               |               |                      |                      |
| <b>Subpopulation 2</b>                                                | Log <sub>10</sub> (MUT,S2)           | CFU/mL | -2.65 (7.74%)                                  | -3.11 (10.9%) | -5.46 (4.32%) | -4.4 (6.26%)         | -3.33 (7.62%)        |
| <b>Subpopulation 3</b>                                                | Log <sub>10</sub> (MUT,S3)           | CFU/mL | -7 (4.14%)                                     | -9.77 (1.87%) | -9.65 (3.98%) | -10.2 (1.53%)        | -9.97 (2.89%)        |
| <b>Enrofloxacin concentration causing 50% of K<sub>max,ENRO</sub></b> |                                      |        |                                                |               |               |                      |                      |
| <b>Subpopulation 1</b>                                                | KC <sub>50,ENRO,S1</sub>             | mg/L   | 10.4 (19.4%)                                   | 7.28 (16.9%)  |               | 7.38 (8.38%)         | 18.2 (20.8%)         |
| <b>Subpopulation 2</b>                                                | KC <sub>50,ENRO,S2</sub>             | mg/L   | 44.7 (6.16%)                                   | 19.3 (13.2%)  |               | 144 (5.85%)          | 181 (17.8%)          |

|                                                                     |                          |      |              |               |                   |                   |
|---------------------------------------------------------------------|--------------------------|------|--------------|---------------|-------------------|-------------------|
| <b>Subpopulation 3</b>                                              | KC <sub>50,ENRO,S3</sub> | mg/L | 182 (11%)    | 131 (16.5%)   | 132 (11%)         | 240 (13%)         |
| <b>Enrofloxacin maximum killing rate constant</b>                   |                          |      |              |               |                   |                   |
| <b>Subpopulation 1</b>                                              | K <sub>max,ENRO,S1</sub> | 1/h  |              |               |                   |                   |
| <b>Subpopulation 2</b>                                              | K <sub>max,ENRO,S2</sub> | 1/h  | 26.5 (14.2%) | 12.1 (22%)    | 3.17 (6.96%)      | 3.44 (14.3%)      |
| <b>Subpopulation 3</b>                                              | K <sub>max,ENRO,S3</sub> | 1/h  |              |               |                   |                   |
| <b>Polymyxin B maximum killing rate constant</b>                    |                          |      |              |               |                   |                   |
| <b>Subpopulation 1</b>                                              | K <sub>max,PMB,S1</sub>  | 1/h  | 28 (12.1%)   | 2.45 (21.8%)  | 8.04 (11.2%)      | 1.49 (108.4%)     |
| <b>Subpopulation 2</b>                                              | K <sub>max,PMB,S2</sub>  | 1/h  | 3.44 (18.9%) | 0.665 (37.1%) | 0.742 (22.1%)     | 3.16 (45.6%)      |
| <b>Subpopulation 3</b>                                              | K <sub>max,PMB,S3</sub>  | 1/h  | 0.05 (33.3%) | 14.3 (40.7%)  | 2.05 (11.9%)      | 1.49 (108.4%)     |
| <b>Polymyxin B concentration causing 50% of K<sub>max,PMB</sub></b> |                          |      |              |               |                   |                   |
| <b>Subpopulation 1</b>                                              | KC <sub>50,PMB,S1</sub>  | mg/L | 1.22 (35.4%) | 4.75 (11%)    | 11.1 (18.8%)      | 0.117 (65.5%)     |
| <b>Subpopulation 2</b>                                              | KC <sub>50,PMB,S2</sub>  | mg/L | 8.64 (26.5%) | 6.26 (15%)    | >100 <sup>a</sup> | >100 <sup>a</sup> |
| <b>Subpopulation 3</b>                                              | KC <sub>50,PMB,S3</sub>  | mg/L | 3.06 (26.1%) | 5.7 (50.4%)   | 19.2 (16.6%)      | 77.5 (16.1%)      |

|                                                                          |                                   |      |               |               |               |               |
|--------------------------------------------------------------------------|-----------------------------------|------|---------------|---------------|---------------|---------------|
| <b>Enrofloxacin hill</b>                                                 |                                   |      |               |               |               |               |
| <b>coefficient for bacterial killing</b>                                 | Log <sub>10</sub> (Hill,ENRO)     | -    | 0.263 (13.6%) | 0.342 (25.9%) | 0.365 (20.2%) | 0.734 (42.9%) |
| <b>Polymyxin B hill</b>                                                  |                                   |      |               |               |               |               |
| <b>coefficient for bacterial killing</b>                                 | Log <sub>10</sub> (Hill,PMB)      | -    | 0.461 (39.8%) | 0.728 (45.1%) | 0.911 (19.4%) | 0.712 (35.3%) |
| <b>PMB concentration causing 50% of I<sub>max,Synergy,PMB</sub></b>      |                                   |      |               |               |               |               |
| <b>Subpopulation 1</b>                                                   | IC <sub>50,Synergy, PMB, S1</sub> | mg/L |               |               |               | <sup>b</sup>  |
| <b>Subpopulation 2</b>                                                   | IC <sub>50,Synergy, PMB, S2</sub> | mg/L | 0.428 (15.1%) | 2.93 (21.9%)  | 0.163 (23.9%) | 54.8 (19.5%)  |
| <b>Subpopulation 3</b>                                                   | IC <sub>50,Synergy, PMB, S3</sub> | mg/L |               |               |               | 10.2 (29.6%)  |
| <b>Maximum fractional decrease of IC<sub>50,Synergy,PMB</sub> by PMB</b> |                                   |      |               |               |               |               |
| <b>decrease of IC<sub>50,Synergy,PMB</sub> by PMB</b>                    | I <sub>max,Synergy,PMB</sub>      | 1/h  | 6.08 (4.12%)  | 9.17 (4.05%)  | 10.6 (1.13%)  | 8.33 (4.94%)  |

<sup>a</sup>Estimated to be a very large value. <sup>b</sup>Estimated to be a very small value. <sup>c</sup>The between-curve variability was set to a coefficient of variation of 10% for all parameters.

<sup>d</sup>Additional time kill data for polymyxin B (1 – 128 mg/L) and enrofloxacin (1- 32 mg/L) monotherapies were included during model development.









**Table S8.** Antibiogram of *P. aeruginosa* 12196.

| <b>Minimum Inhibitory Concentration (mg/L)</b> |     |
|------------------------------------------------|-----|
| <b>Amikacin</b>                                | 16  |
| <b>Ampicillin/sulbactam</b>                    | >16 |
| <b>Aztreonam</b>                               | 16  |
| <b>Cefepime</b>                                | 4   |
| <b>Ceftazidime</b>                             | 2   |
| <b>Ceftriaxone</b>                             | 16  |
| <b>Ciprofloxacin</b>                           | >4  |
| <b>Doripenem</b>                               | 2   |
| <b>Gentamicin</b>                              | >8  |
| <b>Imipenem</b>                                | 1   |
| <b>Levofloxacin</b>                            | >4  |
| <b>Meropenem</b>                               | 8   |
| <b>Polymyxin</b>                               | 64  |
| <b>Piperacillin/tazobactam</b>                 | 16  |
| <b>Tigecycline</b>                             | >4  |
| <b>Tobramycin</b>                              | >16 |

Study Year: 2008; Site Code: 127; Bank Number: 503; Country Ireland; Source: JML Laboratories Iowa

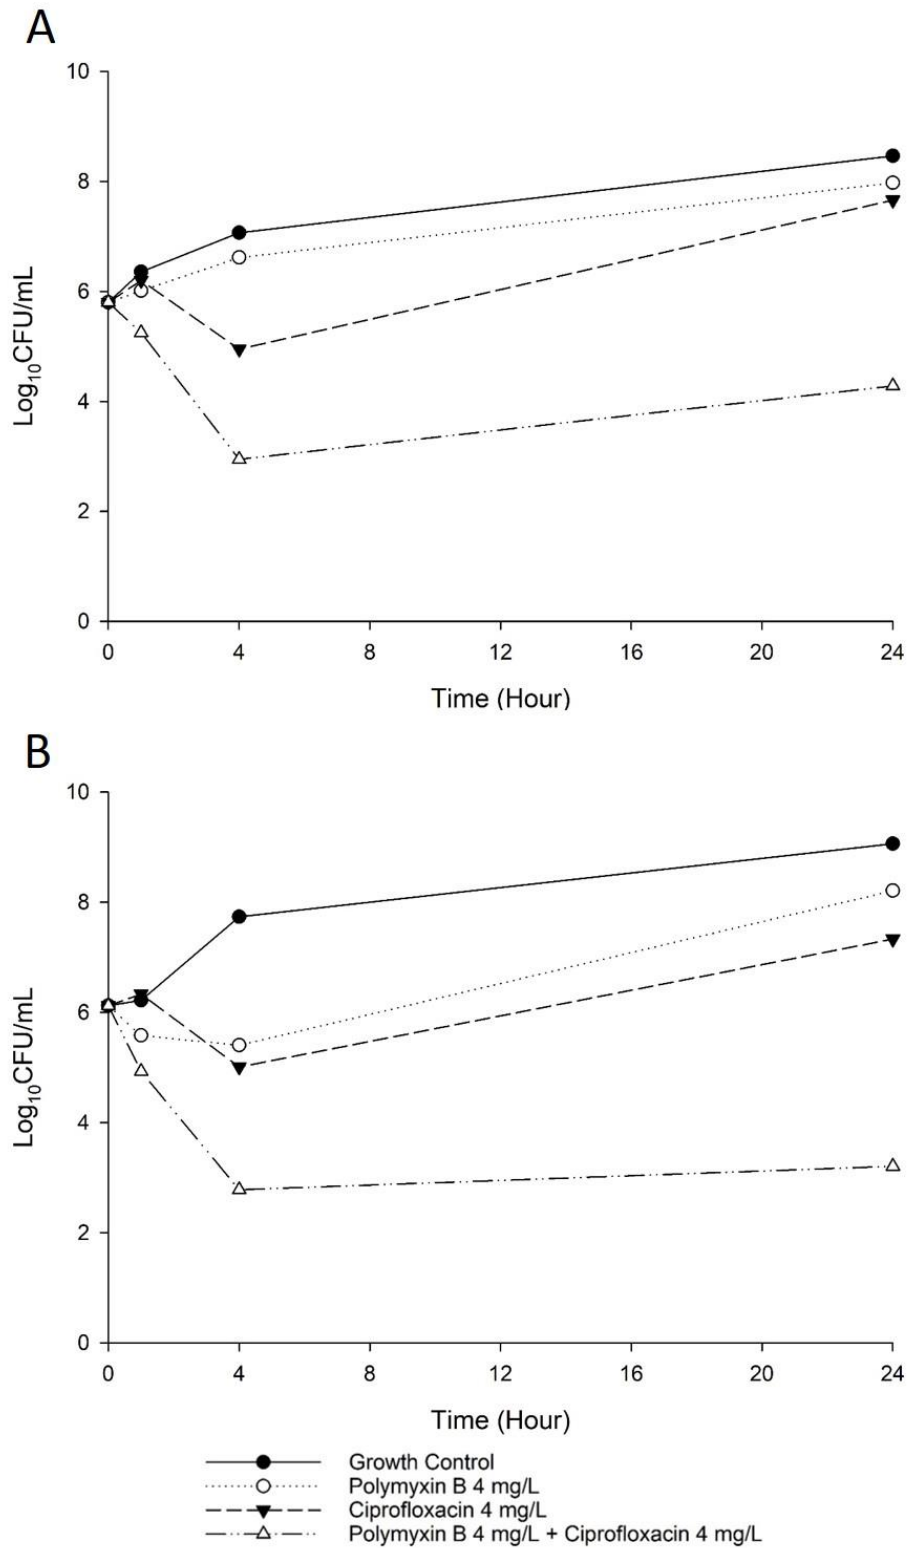

**Figure S1.** Static time-kill curves for polymyxin B and ciprofloxacin alone and in combination against **(A)** *P. aeruginosa* H131300444 and **(B)** *P. aeruginosa* LESB58 at an inoculum of  $\sim 10^6$  CFU/mL.
